# Supplementary material for: Ordered patterns in electroactive polymer ionic liquid blends: effect of long range interactions
Source: Royal Society of Chemistry journal article supplement (doi:10.1039/d4sm00370e), 2024-01-01
Supplement: d4sm00370e1.pdf [file d4sm00370e1.pdf]

Supporting information for  
**Ordered Patterns in Electroactive Polymer Ionic Liquid blends: Effect of  
Long Range Interactions**

Ashima Choudhury<sup>1</sup>, Pratyush Dayal<sup>1\*</sup>

<sup>1</sup>Polymer Engineering Research Lab (PERL), Department of Chemical Engineering, Indian Institute of  
Technology Gandhinagar, Gujarat-382055, India

\*Email: pdayal@iitgn.ac.in

**S1. Contour plots with electric field direction**

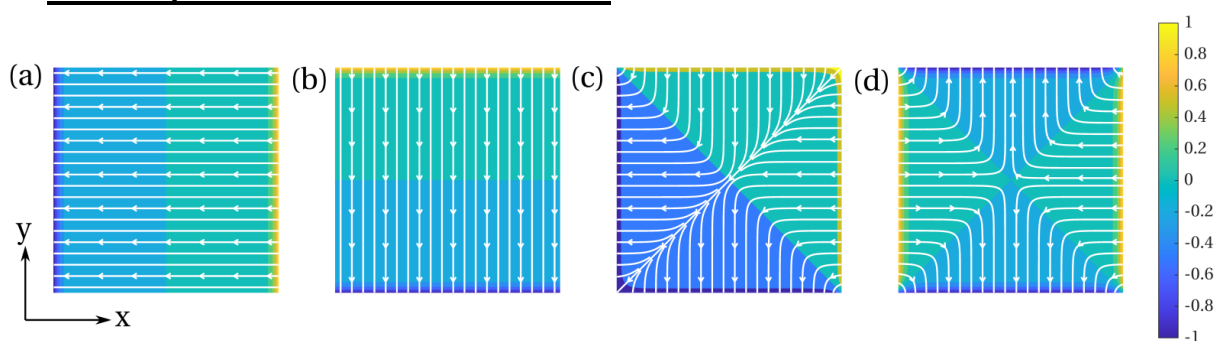

Figure 1: Contour plot with electric field applied in (a) x, (b) y, (c) both x & y direction with positive potential maintained at the top/right, and (d) left/right boundaries.

**S2. Positive potential at left/right boundaries**

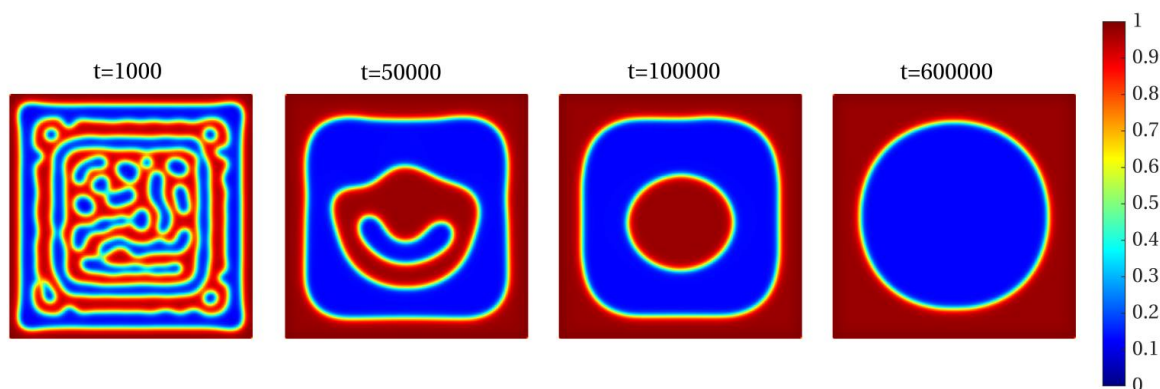

Figure 2: Time evolution of structure development in PIL blend in presence of electric field in both x and y direction with positive potential maintained at the left/right boundaries.
